# Supplementary material for: Multifunctional and self-healable conductive IPN hydrogels functionalized with reduced magnetite graphene oxide for an advanced flexible all in one solid-state supercapacitor
Source: Royal Society of Chemistry journal article supplement (doi:10.1039/d3ma00803g), 2023-11-30
Supplement: d3ma00803g1.pdf [file d3ma00803g1.pdf]

## Multifunctional and self-healable conductive IPN hydrogels functionalized with reduced magnetite graphene oxide for advanced flexible all in one solid state supercapacitor

Tanzil ur Rehman, Luqman Ali shah\* and Mansoor Khan

*Polymer Laboratory, National Centre of Excellence in Physical Chemistry, University of*

*Peshawar, Peshawar 25120 Pakistan*

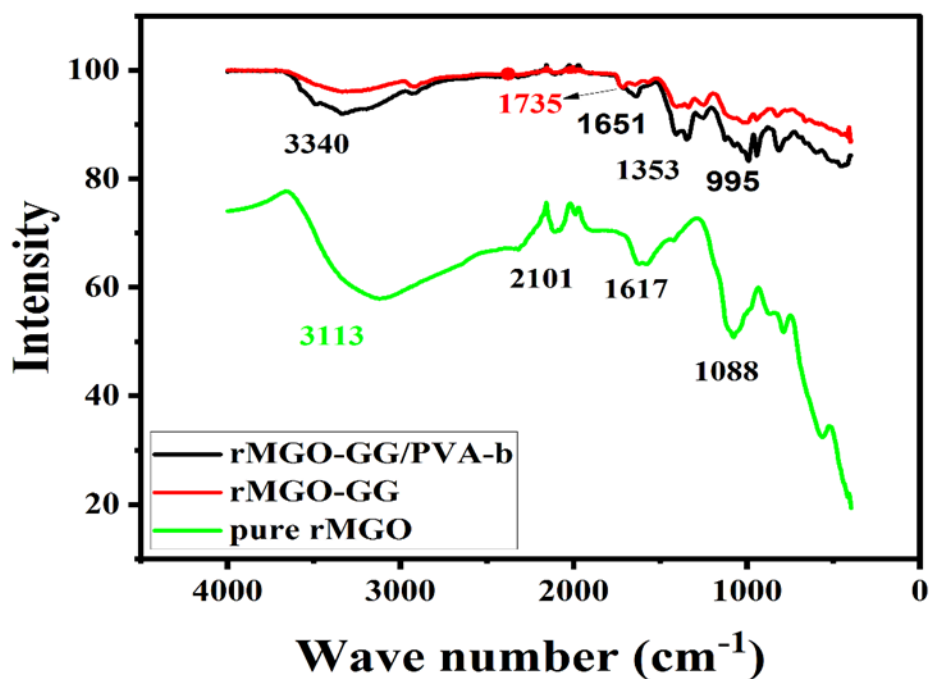

Figure S1. FTIR spectra of rMGO-GG/PVA-b, rMGO-GG and pure rMGO

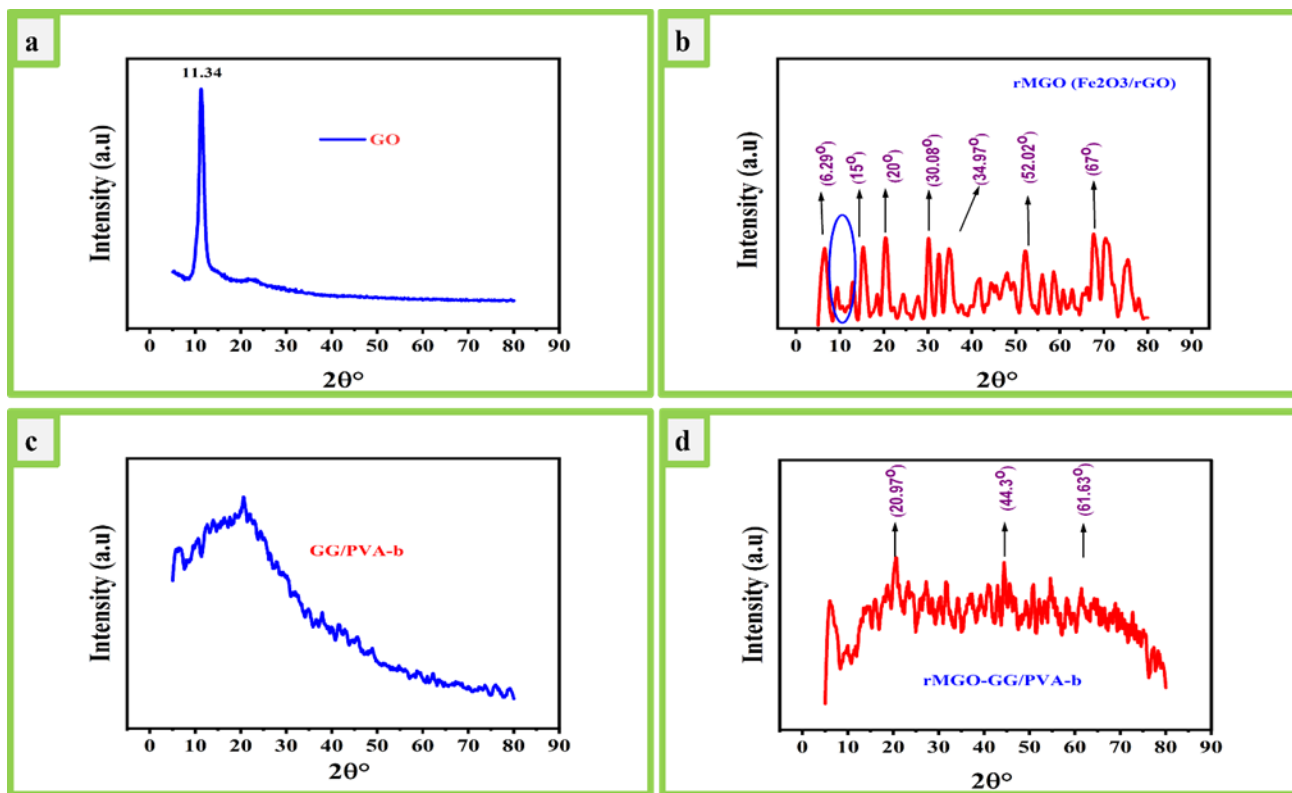

Figure S2. XRD analysis and pattern of a) GO, b) rMGO, c) GG-PVA-b and d) rMGO-GG/PVA-b

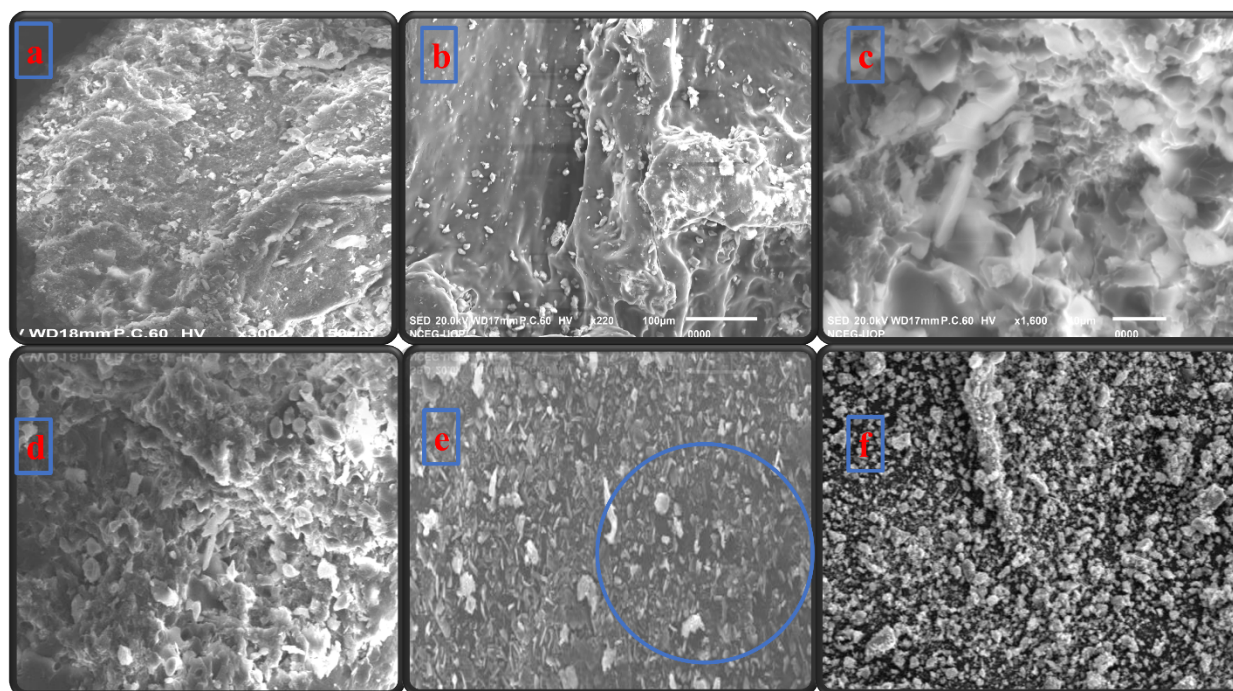

Figure S3. SEM images of GG-PVA (a and b at 50 and 10  $\mu\text{m}$ ) while rMGO-GG/PVA-b2 (c,d and e at 50  $\mu\text{m}$ ) and f) rMGO at 50  $\mu\text{m}$  resolution.
